# **A gatekeeping role of ESR2 to maintain the primordial follicle reserve**

V. Praveen Chakravarthi<sup>1</sup>, Subhra Ghosh<sup>1</sup>, Katherine F. Roby<sup>2</sup>, Michael W. Wolfe<sup>3</sup>, and M. A. Karim Rumi<sup>1\*</sup>

<sup>1</sup>Department of Pathology and Laboratory Medicine, <sup>2</sup>Department of Anatomy and Cell Biology, <sup>3</sup>Department of Molecular and Integrative Physiology, University of Kansas Medical Center, Kansas City, Kansas, USA

**Short title:** ESR2 regulates primordial follicle activation

**Keywords:** Estrogen receptor  $\beta$  (ESR2), mutant rat models, primordial follicle activation, premature ovarian insufficiency, and activation of the AKT and mTOR pathways.

**\* Correspondence:** M. A. Karim Rumi, [mrumi@kumc.edu](mailto:mrumi@kumc.edu)

**Grants or fellowships support:** This study was supported in part by the School of Medicine Bridging grant from the University of Kansas Medical Center.

**Disclosure:** The authors do not have any conflict of interest.

# **Abstract**

Over the entire reproductive lifespan in mammals, a fixed number of primordial follicles serve as the source of mature oocytes. Uncontrolled and excessive activation of primordial follicles can lead to depletion of the ovarian reserve. We observed that disruption of ESR2-signaling results in increased activation of primordial follicles in *Esr2*-null (*Esr2*<sup>-/-</sup>) rats. However, follicle assembly was unaffected, and the total number of follicles remained comparable between neonatal wildtype and *Esr2*<sup>-/-</sup> ovaries. While the activated follicle counts were increased in *Esr2*<sup>-/-</sup> ovary, the number of primordial follicles were markedly decreased. Excessive recruitment of primordial follicles led to premature ovarian senescence in *Esr2*<sup>-/-</sup> rats and was associated with reduced levels of serum AMH and estradiol. Disruption of ESR2-signaling through administration of a selective antagonist (PHTPP) increased the number of activated follicles in wildtype rats, whereas a selective agonist (DPN) decreased follicle activation. In contrast, primordial follicle activation was not increased in the absence of ESR1 indicating that the regulation of primordial follicle activation is ESR2-specific. Follicle activation was also increased in *Esr2*-mutants lacking the DNA-binding domain, suggesting a role for the canonical transcriptional activation function. Both primordial and activated follicles express ESR2 suggesting a direct regulatory role for ESR2 within these follicles. We also detected that loss of ESR2 augmented the activation of AKT, ERK and mTOR pathways. Our results indicate that the lack of ESR2 upregulated both granulosa and oocyte factors, which can facilitate AKT and mTOR activation in *Esr2*<sup>-/-</sup> ovaries leading to increased activation of primordial follicles.

## Introduction

Primordial follicles generated during early life serve as the source of fertilizable oocytes in mammals throughout the reproductive lifespan (1). A limited number of primordial follicles are steadily recruited into the growing pool while the remaining are maintained in the dormant state (2,3). The female reproductive life comes to an end when folliculogenesis ceases due to the loss of primordial follicles (4,5). Regulation of the dormancy and selective activation of primordial follicles plays an important role in determining the reproductive lifespan in females (6). An uncontrolled and increased activation of primordial follicles leads to excessive depletion of the ovarian reserve and development of premature ovarian insufficiency (POI), which causes infertility and estrogen deficiency in 1-2% of all women of reproductive age (7-9). Pathological conditions as well as certain therapeutic procedures that deplete the follicle reserve can also lead to POI (10). Understanding the regulatory mechanisms of primordial follicle activation remains critical for prevention or treatment of POI.

Activation of primordial follicles to primary follicles is a strictly regulated and steady process. This activation is gonadotropin independent, but the exact molecular mechanisms of the prolonged dormancy and selective recruitment of primordial follicles remain largely unclear (11). Primordial follicles consist of dormant oocytes surrounded by a few flattened granulosa cells (GCs). Activation of the primordial follicle is characterized by growth and differentiation of the flattened GCs to cuboidal GCs as well as oocyte growth and deposition of the zona pellucida (ZP) matrix by the oocytes (12-14). Signaling pathways in both GCs and oocytes have been found to play important roles in primordial follicle activation (15). It has been suggested that the process starts in the GCs, and the signals from GCs subsequently activating the oocytes in primordial follicles (16,17). Conversely, studies have also indicated that the activation process can be initiated

in the oocytes of primordial follicles (14). Inhibitory factors secreted from the primordial follicles or from activated follicles may also maintain the primordial follicles in a dormant state (18).

Previous studies with mutant mouse models have identified several growth factors and cytokines involved in primordial follicle activation. While TGF- $\beta$  superfamily members such as bone morphogenic proteins (BMPs) and growth and differentiation factors (GDFs) act as positive regulators (19,20), AMH acts as a negative regulator of primordial follicle activation (21). Growth factors unrelated to the TGF- $\beta$  superfamily including KITLG (22) and FGF2 (23), also enhance the activation process. These growth factors and cytokines regulate key signaling pathways and transcriptional regulators. Regulation of PI3 kinase (PI3K) and mTOR-signaling and the downstream transcription factor FOXO3A are essential regulators of primordial follicle activation (14,24). In addition to FOXO3A (25), several other transcription factors have been found to be important for the regulation of follicle activation. FOXL2 (26) in primordial GCs as well as SOHLH1 (27), SOHLH2 (28), NOBOX (29), LHX8 (27), GATA4, and GATA6 (30) in oocytes carry out important regulatory functions. We recently observed that transcriptional regulation mediated by estrogen receptor  $\beta$  (ESR2) plays an essential role during primordial follicle activation.

ESR2 is the predominant estrogen receptor in the ovary (31-34). ESR2 polymorphisms and mutations in women have been linked to ovulatory dysfunctions, including complete ovarian failure (35-38). *Esr2*-mutant mouse (39,40) and rat models (41) suffer from defective follicle development and failure of ovulation. Studies have suggested that estrogen signaling plays a role in follicle assembly and early follicle development (42,43), but a role of ESR2 in ovarian primordial follicle activation has not yet been demonstrated. In this study, we observed that disruption of ESR2 signaling markedly increases the activation of primordial follicles. Our

findings suggest that the transcriptional regulatory function of ESR2 plays a gatekeeping role in maintaining the primordial follicle reserve.

## Materials and Methods

### Animal models

Wildtype, *Esr1*-knockout, and *Esr2*-mutant Holtzman Sprague-Dawley (HSD) rats were included in this study. The *Esr1*-knockout rat model was generated by the deletion of exon 3 in the *Esr1* gene, which caused a frameshift and null mutation (*Esr1*<sup>-/-</sup>) (44). *Esr2*-mutant rat models were generated by targeted deletion of the exon 3 or exon 4 in the *Esr2* gene (41). Exon 3 deletion caused a frameshift and null mutation (*Esr2*<sup>-/-</sup>), whereas exon 4 deletion resulted in a mutant ESR2 protein lacking the DNA binding domain (DBD). Rats were screened for the presence of mutations by PCR using tail-tip DNA samples (RED extract-N-Amp Tissue PCR Kit, Sigma-Aldrich) as previously described (41,44). All procedures were performed in accordance with the protocols approved by the University of Kansas Medical Center Animal Care and Use Committee.

### Gonadotropin treatment for follicle maturation

28-day-old *Esr2*<sup>-/-</sup> and age-matched wildtype female rats were used for the evaluation of gonadotropin-induced ovarian follicle development. Synchronized follicle maturation was induced by intraperitoneal injection of 30 IU PMSG (Lee Biosolutions, Maryland Heights, MO). 48h after the PMSG injection, 30 IU of hCG (Lee Biosolutions) was injected intraperitoneally. 4h after hCG injection, ovaries were collected and processed for histological examination, or cumulus-oocyte complexes (COCs) were harvested by needle-puncture of the large antral follicles under

microscopic examination as described previously (45). Cumulus cells were mechanically detached from the COCs by repeated pipetting, and the oocytes were counted under microscopic examination.

#### **Treatment with selective ESR2-antagonist and -agonist**

A selective ESR2 antagonist PHTPP (46) or a selective ESR2 agonist DPN (47) (Cayman Chemical, Ann Arbor, MI) was dissolved in DMSO (5µg/µl). 2µl of PHTPP (10µg) or 2µl of DPN (10µg) was further diluted in 50µl of sesame oil (Sigma-Aldrich, St. Louis, MO) and injected subcutaneously into wildtype rats from postnatal day (PND) 5 to 15. Rats were sacrificed on PND16, and the ovaries were processed either for histological examination or for total RNA and protein analyses.

#### **Blood collection and hormone assays**

Blood samples were collected by cardiac puncture at sacrifice. After clotting at room temperature, serum was separated by centrifugation and frozen at -80°C. Serum AMH level was determined by an enzyme immunoassay (AL-113, Ansh Labs, Webster, TX). Total serum 17β-estradiol (E2) and serum progesterone (P4) levels were measured by RIA as described previously (48).

#### **Total follicle counting in the serial sections of whole ovary**

Ovaries were collected and fixed in 4% formaldehyde overnight, processed, and embedded in paraffin following standard procedures (49-51). Whole ovaries were serially sectioned at 6 µM thickness and stained with hematoxylin and eosin (H&E) (49-51). The stages of follicle development including primordial, primary, secondary, early antral, and antral were determined

as described previously (52). The primordial follicles were recognized as small oocytes surrounded by a few flattened GCs, the primary follicles contained larger oocytes surrounded by a single layer of cuboidal GCs, and the oocytes in the secondary follicles were surrounded by multiple layers of GCs. The tertiary follicles were categorized into early antral and antral follicles based on appearance and extent of the cavities within the follicles (**Figure 1D**). Atretic follicles were recognized by pyknotic GCs surrounding degenerated oocytes. The follicles were counted on every fifth section under light microscopy (49,50). To avoid counting the same follicle more than once, primordial and primary follicles were counted if they exhibited a nucleus, whereas the secondary, early antral, and antral follicles were counted only in presence of a nuclei with prominent nucleoli (49-51). The counts were multiplied by 5 to obtain the total count of follicles in the whole ovary.

#### **Protein extraction and western blotting**

Ovaries were collected on PND 4, 6, and 8, and total protein was extracted from the ovaries using 1X SDS lysis buffer (62.5mM Tris-HCl pH 6.8, 2% SDS, 42 mM dithiothreitol, 10% glycerol, and 0.01% bromophenol blue), containing protease and phosphatase inhibitors (Cell Signaling Technologies, Danvers, MA). Ovarian lysates were sonicated to shear DNA and reduce viscosity, heat denatured, and separated on a 4-20% SDS-PAGE. Electrophoresed proteins were transferred from the gel to PVDF membranes, blocked with 5% skim milk in TBST (1xTBS buffer containing 0.1% Tween-20), and incubated for 1h at room temperature with specific primary antibodies (**Table 1**) at the appropriate dilution in blocking solution. After removing the unbound primary antibody solution, membranes were washed with TBST, blocked, and incubated with peroxidase-conjugated anti-mouse, or anti-rabbit secondary antibodies (Jackson ImmunoResearch, West

Grove, PA) at a dilution of 1:25,000 to 50,000, and the immunoreactivity signals were visualized with Luminata Crescendo HRP substrate (Millipore Sigma, Burlington, MA).

## **RNA extraction and RT-qPCR**

Total RNA was extracted from the PND8 ovaries using TRI Reagent (Sigma-Aldrich). 1000ng of total RNA from each sample was used for the preparation of cDNA using High-Capacity cDNA Reverse Transcription (RT) Kits (Applied Biosystems, Foster City, CA). The cDNA was diluted 1:50 in 10mM Tris-HCl (pH 7.4) and 2.5 µl of the diluted cDNA was used in a 10 µl quantitative PCR (qPCR) reaction mixture containing Applied Biosystems Power SYBR Green PCR Master Mix (Thermo Fisher Scientific). Amplification and fluorescence detection of RT-qPCR were carried out on Applied Biosystems QuantStudio Flex 7 Real Time PCR System (Thermo Fisher Scientific). The  $\Delta\Delta CT$  method was used for relative quantification of target mRNA expression and normalized to Rn18s (18S rRNA) level. A list of qPCR primers is shown in **Table 2**.

## **Isolation of primordial and primary follicles**

Approximately 100 mg of minced PND12 rat ovary tissue was digested in 1ml of digestion medium [199 media containing 0.08 mg/ml of liberase with medium-concentration of thermolysin (Roche Diagnostics GmbH, Mannheim, Germany) supplemented with 5U/ml of DNase I and 1% BSA (Thermo Fisher Scientific, Waltham, MA)]. The digestion mix was agitated on an orbital shaker (Disruptor Genie, Scientific Industries, Bohemia, NY) at 1500 rpm for 30 min at room temperature. The enzymatic reaction was stopped by addition of 10% FBS. Digested ovary tissues were passed through a 70µM cell strainer (Thermo Fisher Scientific) to remove the secondary, and large follicles as well as tissue aggregates. The filtrate containing the small follicles and cellular



components was filtered again through a 35µM cell strainer (BD Falcon, Franklin Lakes, NJ). The 35µM strainer was reverse eluted with medium 199 to isolate the primary follicles and the filtrate was subjected to sieving through a 10µM cell strainer (PluriSelect USA, Gillespie Way, CA) to separate the primordial follicles from other cellular components. Finally, the 10µM cell strainer was reverse eluted to isolate the primordial follicles. Unwanted cellular components were removed from the desired follicles under microscopic examination before proceeding to RNA isolation.

### **Gene expression analyses in primordial and primary follicles**

We used 200-250 primordial follicles and 100-150 primary follicles for cDNA synthesis using the Message Booster cDNA synthesis kit (Lucigen, Palo Alto, CA). Direct cDNA and subsequent cRNA syntheses were performed by following the manufacturer's instruction. *In vitro* synthesized cRNA was purified by using Monarch RNA cleanup kit (New England Biolabs, Ipswich, MA) and subjected to first strand, and subsequent second strand cDNA synthesis using the reagents provided in the Message Booster cDNA synthesis kit. The cDNA was diluted 1:10 in 10mM Tris-HCl (pH 7.4) and 2.5 µl of the diluted cDNA was used in 10 µl qPCR reaction as described above. The relative quantification of target mRNA expression was calculated by normalizing the data with *Actb* expression.

### **Statistical analyses**

Follicle counting was performed on more than 3 individual rats of the same genotype at each time point. Gene expression analyses were performed on at least 6 individual rats. The experimental results are expressed as mean ± SE. Statistical comparisons between two means were determined with Student's t-test while comparisons among multiple means were evaluated with ANOVA

followed by Duncan post hoc test.  $P$  values  $\leq 0.05$  were considered as significant level of difference. All statistical calculations were done with SPSS 22 (IBM, Armonk, NY).

## Results

### Increased number of antral follicles in *Esr2*<sup>-/-</sup> rats

Exogenous gonadotropins were administered to PND28 prepubertal rats to induce follicle maturation. Compared to the wildtype, *Esr2*<sup>-/-</sup> ovaries exhibited a larger number of antral follicles 4h after hCG administration into PMSG primed rats (**Figure 1A, B**). At this time point, cumulus-oocyte complexes (COCs) were isolated from the gonadotropin-stimulated ovaries by needle puncture, and cumulus cells were mechanically removed to count the oocytes. Oocyte counts were significantly higher in *Esr2*<sup>-/-</sup> rats (**Figure 1C**). To compare the extent of follicle maturation between wildtype and *Esr2*<sup>-/-</sup> rats, total follicle counting was performed in serial sections of gonadotropin-stimulated ovaries. While the number of primordial follicles were decreased, the number of primary, secondary, and antral follicles were markedly increased in the ovaries of *Esr2*<sup>-/-</sup> rats (**Figure 1E-G**). We further investigated the status of follicle activation in *Esr2* mutant rats prior to gonadotropin treatment.

### Loss of ESR2 leads to the activation of primordial follicles

We detected an increase in the recruitment of primordial follicles to the growing pool in PND28 *Esr2*<sup>-/-</sup> rat ovaries in the absence of any gonadotropin treatment (**Figure 2A-C, J, M**). To determine the postnatal period during which increased follicle activation becomes evident, further ovarian follicle counting was performed on PND16 and PND8. A decrease in primordial follicle counts with a corresponding increase in the number of activated follicles was detected in both

PND16 (**Figure 2D-F, K, N**) and PND8 (**Figure 2G-I, L, O**) *Esr2*<sup>-/-</sup> ovaries. At all-time points, increased primordial follicle activation was found to be approximately twofold greater in *Esr2*<sup>-/-</sup> rats compared to wildtype. However, there was an increased number of atretic follicles in *Esr2*<sup>-/-</sup> ovaries (**Figure 2B, E, H**).

### **Loss of ESR2 results in premature ovarian senescence**

We observed that total follicle counts in PND8 ovaries were similar between the wildtype and *Esr2*<sup>-/-</sup> rats; however, the primordial follicle counts were decreased by ~35% in *Esr2*<sup>-/-</sup> ovaries (**Figure 3A**). Further analyses of follicle count in 4wk, 12wk, and 24wk old *Esr2*<sup>-/-</sup> and age-matched wildtype rats revealed a sharp decline in primordial follicles in *Esr2*<sup>-/-</sup> ovaries (**Figure 3B-H**). Moreover, this decline in ovarian follicle numbers was associated with a significantly lower levels of serum estradiol and AMH in 24 wk old *Esr2*<sup>-/-</sup> rats. (**Figure 3I, J**).

### **Regulation of primordial follicle activation is ESR2-dependent**

Similar to *Esr2*<sup>-/-</sup> rats, an increased activation of primordial follicles was also observed in rats carrying a homozygous mutation in the DBD of *Esr2* (**Figure 4A, B, G, I, J**). The number of growing follicles was markedly increased while the number of primordial follicles decreased. However, this altered recruitment of primordial follicles was not detected in *Esr1*<sup>-/-</sup> rat ovaries (**Figure 4A, C, G, I, K**). In addition, treatment of wildtype rats with a selective ESR2-antagonist (PHTPP) resulted in increased activation of primordial follicles (**Figure 4D, E, H, L, M**). In contrast, treatment of wildtype rats with a selective ESR2-agonist (DPN) increased the proportion of follicles in the primordial state (**Figure 4D, F, H, L, N**).

## Disruption of ESR2 resulted in activation of the AKT and mTOR pathways

We detected abundant expression of ESR2 mRNA and protein in PND4, 6 and 8 ovaries (**Figure 5 A, B**). Expression of *Esr2* was also evident in primordial and primary follicles isolated from wildtype rat ovaries (**Figure 5 C-E**). Previous studies have shown that primordial follicle activation is regulated by the PI3K-PTEN-AKT and the mTORC1-TSC1/2-P70S6K signaling pathways (14,53). We therefore assessed the activation status of selected signaling molecules within these pathways in PND8 *Esr2*<sup>-/-</sup> ovaries and compared with that of wildtype. We observed increased activation of pAKT (T308 and S473) (**Figure 5F-I**), pERK1/2 (T202/Y204) (**Figure 5L-M**), mTORC1 (S2448) (**Figure 5P-Q**), and the downstream targets p70S6K (T389) (**Figure 5R-S**) and pRPS6 (S240/244) (**Figure 5T-U**). However, no significant alteration in PTEN levels (**Figure 5J-K**) or pTSC2 (T1462) phosphorylation (**Figure 5N-O**) was observed in *Esr2*<sup>-/-</sup> ovaries.

## Loss of ESR2 increased expression of factors upstream of AKT and mTOR signaling

ESR2 is a transcriptional regulator and we have determined that the DB- dependent transcriptional activation function of ESR2 is required for regulation of primordial follicle activation (**Figure 4**). Therefore, we assessed the expression of factors that are known to activate the AKT and mTOR pathways and increase primordial follicle activation. Upstream regulators of AKT signaling including *Kitlg*, *Kit*, and *Igf1* (**Figure 6A-C**) as well as *Adcyap1r1* (**Figure 6F**) were upregulated in PND8 *Esr2*<sup>-/-</sup> ovaries. Oocyte derived TGFβ family members including *Bmp4*, *Bmp15*, and *Gdf9* were also significantly upregulated in *Esr2*<sup>-/-</sup> ovaries (**Figure 6G-I**). In addition, transcriptional regulators *Gata4* (**Figure 6N**), and *Npm2* (**Figure 6O**) were markedly upregulated in *Esr2*<sup>-/-</sup> ovaries. However, expression of *Fgf2* (**Figure 6D**), *Ntrk2* (**Figure 6E**), *Amh* (**Figure**

**6J**), *Bdnf* (**Figure 6K**), *Nobox* (**Figure 6L**), and *Sohlh1* (**Figure 6M**) was similar between *Esr2*<sup>-/-</sup> and wildtype ovaries.

## Discussion

During the isolation of oocytes from the gonadotropin stimulated PND28 ovaries, we were surprised by a threefold higher yield in *Esr2*<sup>-/-</sup> rats. This appears to be due to the presence of a large number of activated follicles in *Esr2*<sup>-/-</sup> ovaries that were able to respond to gonadotropin treatment. This increased number of activated follicles was associated with a decreased number of primordial follicles suggesting excessive recruitment of primordial follicles. It is well known that activation of primordial follicles is independent of gonadotropin signaling (11). Thus, increased activation of primordial follicles observed in *Esr2*<sup>-/-</sup> rats was presumably independent of gonadotropin stimulation. It was confirmed by an increased activation of primordial follicles in PND8 and PND16 *Esr2*<sup>-/-</sup> ovaries and these findings suggest involvement of an intraovarian mechanism, which was defective during the early ovarian development due to the lack of ESR2.

Estrogen signaling plays a crucial role in ovarian follicle assembly, follicle development, and ovulation (42,43). Previous studies have shown that increased activation of ESR2-signaling can result in aberrant assembly of primordial follicles (42,43,54,55). However, we did not detect any significant changes in total follicle counts in PND8 ovaries due to the disruption of ESR2-signaling. Rather, we did observe a reduced number of primordial follicles and increased numbers of primary and other growing follicles. Our findings suggest that ESR2 functions in controlling the entry of primordial follicles into the growing pool, and thus plays a decisive role in determining female reproductive longevity.

In spite of normal follicle assembly and the establishment of the primordial follicle pool, excessive activation resulted in premature depletion of the primordial follicles in *Esr2*<sup>-/-</sup> rats. By 24 weeks of age, *Esr2*<sup>-/-</sup> rats contained less than 15% of the primordial follicles observed in wildtype ovaries (Fig 3B). As expected, the rapid decline in the follicle reserve led to premature ovarian senescence associated with a low AMH and estradiol level. AMH is an established indicator of follicle reserve and the serum level correlates well with the fertility potential (56,57). As polymorphisms or mutations can affect ESR2 function (35-38) and some endocrine disruptors can act as ESR2 agonists or antagonists (58-61), ESR2 regulation of primordial follicle activation can have a significant impact on women's health and fertility.

Disruption of either ESR1 or ESR2 signaling results in dysregulation of gonadotropin secretion associated with a failure in follicle development and ovulation (39-41). Administration of exogenous gonadotropins fails to induce normal follicle maturation and ovulation in these mutant animals suggesting that disruption of estrogen signaling results in a primary ovarian defect (39-41). Increased activation of primordial follicles in *Esr2*<sup>-/-</sup> rats represents such a primary intraovarian defect. Absence of any increased activation of primordial follicles in *Esr1*<sup>-/-</sup> rats indicates that the regulatory mechanism is specific to ESR2. Furthermore, complete loss of ESR2 or loss of the DBD of ESR2 led to a similar phenotype, highlighting the requirement of the canonical transcriptional function of ESR2 in maintaining the primordial follicle reserve. In line with these observations, manipulation of ESR2 signaling by administration of selective antagonist or agonist into wildtype rats demonstrated that ESR2 plays a gatekeeping role during primordial follicle recruitment. Thus, transcriptional activation of ESR2 with selective ligands may prospectively increase the reproductive longevity in females. Selective ESR2-antagonists may also prove effective for *in vitro* activation (IVA) of primordial follicles.

It has been previously demonstrated that increased activation of AKT leads to accelerated activation of primordial follicles and depletion of the follicle reserve (62,63). Thus, increased activation of AKT in *Esr2*<sup>-/-</sup> rats may be related to the increased activation of primordial follicles. *Esr2*<sup>-/-</sup> rat ovaries also demonstrated increased activation of the mTOR and ERK pathways. Activated AKT can activate the mTOR pathway, which can also promote primordial follicle activation (14,53). A recent study has shown that ERK activation can induce primordial follicle activation through the KIT-mTOR signaling (64). Due to the complex architecture of the ovary (containing follicles at different stages and extrafollicular cells), it is difficult to discern whether these changes in signaling pathways are strictly due to accelerated primordial follicle development or reflect changes within primordial follicles.

While screening for candidate genes that may act as upstream regulators of the PI3K-AKT pathway, we identified upregulated expression of several growth factors and cytokines in *Esr2*<sup>-/-</sup> ovaries (**Figure 6,7**). Among these growth factors, KITLG and IGF1 can activate receptor tyrosine kinases on oocytes and induce activation of primordial follicles (22,65-67). The other upregulated factors are oocyte-derived TGF $\beta$  family members including BMP4, BMP15, and GDF9, which are known to stimulate follicle activation (19,20). While GDF9 and BMP15 can activate the mTOR pathway (68), BMP signaling can also activate the ERK pathway through TAK1 (69). In addition to these factors, upregulation of ADCYAP1R1, and NPM2 were prominent in PND8 *Esr2*<sup>-/-</sup> rat ovaries, which might have also contributed to the activation of the PI3K-AKT pathway. NPM2 is a transcriptional regulator in oocytes (70), which was found to activate the AKT (71,72), mTOR, and ERK pathways in other cells (73). While ADCY3 is expressed in oocytes, its receptor ADCYAP1R1 is expressed in GCs; ADCY3 signaling generates cAMP, which in turn can activate

the AKT pathway (74). As stated previously, these factors may regulate follicle activation but how ESR2 is implicating them in the ovary is currently unclear.

In this study, we demonstrate a novel role of ESR2 in maintaining the primordial follicle reserve. Excessive activation of primordial follicles leads to premature loss of the follicle reserve. Our findings suggest that ESR2 is involved in downregulating the expression of ovarian-derived factors, which function to activate key signaling pathways that induce primordial follicle activation. Loss of ESR2 upregulates these factors and results in an increased activation of the signaling pathways that promotes primordial follicle activation.

**Acknowledgments:** We acknowledge the financial support from the KUMC School of Medicine (SOM Bridging Grants) for completion of this research.

## FIGURE LEGENDS

**Figure 1.** Gonadotropin stimulation resulted in an increased number of antral follicles in *Esr2*<sup>-/-</sup> ovaries. Wildtype (WT) and *Esr2*<sup>-/-</sup> rats were treated with exogenous gonadotropins on PND28. 48h after PMSG (30IU) injection, rats were administered with hCG (30IU). 4h after the hCG injection, ovaries were collected and processed for histological examination or collection of COCs. Histological examination demonstrated the presence of ovarian follicles at different stages of development in WT rats (**A**). In contrast, *Esr2*<sup>-/-</sup> rat ovaries showed an increased number of antral follicles (**B**). Cumulus cells were detached from the oocytes by mechanical pipetting before counting under microscope. Oocyte yield was about three-fold higher in *Esr2*<sup>-/-</sup> rat ovaries (**C**). Serially sectioned whole ovaries were stained with H&E, and follicles at different stages were



counted in WT and *Esr2*<sup>-/-</sup> rats (**D**). Follicle counting demonstrated a decreased number of primordial follicles and an increased number of activated follicles in *Esr2*<sup>-/-</sup> rats (**E-G**). Data shown as mean  $\pm$  SE,  $n \geq 3$ . \* $P \leq 0.05$ .

**Figure 2.** Increased activation of primordial follicles in *Esr2*<sup>-/-</sup> rat ovaries. Follicle counting in PND28 (**A-C, J, M**), PND16 (**D-F, K, N**), and PND8 (**G-I, L, O**) wildtype (WT) and *Esr2*<sup>-/-</sup> rats showed increased activation of primordial follicles in *Esr2*<sup>-/-</sup> ovaries. Primordial follicle activation was near two-fold starting on PND8 (**G-I, L, O**). A greater number of atretic follicles were present within the pool of activated follicles at PND28 (**A, B**) PND16 (**D, E**) and PND8 (**G, H**) in *Esr2*<sup>-/-</sup> ovaries. Data shown as mean  $\pm$  SE,  $n \geq 3$ . \* $P \leq 0.05$ . Pd, Primordial follicle; Py, Primary follicle.

**Figure 3.** Premature ovarian senescence in *Esr2*<sup>-/-</sup> rats. The total number of follicles in PND8 ovaries were similar between wildtype (WT) and *Esr2*<sup>-/-</sup> rats; however, the number of primordial follicles were decreased in *Esr2*<sup>-/-</sup> ovaries (**A**). Follicle counts in 4wk, 12wk, and 24wk old WT and *Esr2*<sup>-/-</sup> rats revealed a sharp decline in the primordial follicle reserve in *Esr2*<sup>-/-</sup> ovaries (**B-H**). 24wk old *Esr2*<sup>-/-</sup> rats showed a significantly lower level of serum estradiol and AMH compared to WT (**I, J**). Data shown as mean  $\pm$  SE,  $n \geq 3$  (follicle counting) and  $n \geq 6$  (hormone assays), \* $P \leq 0.05$ . Pd, Primordial follicle; Py, Primary follicle.

**Figure 4.** Regulation of primordial follicle activation is ESR2-dependent. Deletion of the ESR2 DBD increased primordial follicle activation at PND28 ovaries (**A, B, G, I, J**), but this was not observed in ovaries from *Esr1*<sup>-/-</sup> rats (**C, G, K**). Administration of a selective ESR2 antagonist, PHTPP, into wildtype rats increased primordial follicle activation (**D, E, H, L, M**), whereas

treatment with an ESR2 agonist, DPN, suppressed the activation (**F, H, N**). Data shown as mean  $\pm$  SE,  $n \geq 3$ . \*  $P \leq 0.05$ . Rel., Relative. Pd, Primordial follicle; Py, Primary follicle.

**Figure 5.** Activation of AKT, ERK, and mTOR signaling in *Esr2*<sup>-/-</sup> ovaries. Expression of ESR2 was detected in PND4, 6, and 8 rat ovaries using RT-qPCR (**A**) and western blotting (**B**). Primordial (Pd) (**C**), and primary (Py) (**D**) follicles were isolated from rat ovaries by digestion with liberase followed by size fractionation with strainers. RT-qPCR analysis demonstrated *Esr2* expression in both Pd and Py follicles (**E**). Western blot analyses of PND8 ovaries and quantification of signal intensities demonstrated a significant increase in AKT (**F-I**) and ERK1/2 (**L-M**) activation. This was associated with increased activation of mTORC1 (**P-Q**) and its targets P70S6K (**R-S**) and RPS6 (**T-U**). But no difference was observed in PTEN (**J-K**) and pTSC2 (**N-O**) levels. Signal quantification data are presented as mean  $\pm$  SEM.  $n \geq 6$ . \* $P \leq 0.05$ . Rel., Relative.

**Figure 6.** Transcript levels of known activators of the AKT and mTOR pathways. RT-qPCR was performed on PND8 wildtype (WT) and *Esr2*<sup>-/-</sup> rat ovaries to analyze the expression of genes involved in activation of the AKT and mTOR pathways and activation of primordial follicles. While the expression of *Kitlg* (**A**), *Kit* (**B**), *Igf1* (**C**), *Bmp15* (**H**) and *Gdf9* (**I**) was moderately upregulated in *Esr2*<sup>-/-</sup> rat ovaries, *Adcyap1r1*(**F**), *Bmp4* (**G**), *Gata4* (**N**), and *Npm2* (**O**) were highly upregulated. But no significant differences in the expression of *Fgf2* (**D**), *Ntrk2* (**E**), *Amh* (**J**), *Bdnf* (**K**), *Nobox* (**L**) and *Sohlh1*(**M**) were observed between the WT and *Esr2*<sup>-/-</sup> rat ovaries. RT-qPCR data represent the mean  $\pm$  SEM.  $n \geq 8$ . \* $P \leq 0.05$ . Rel., Relative.

**Figure 7.** ESR2 signaling in the regulation of primordial follicle activation. Loss of ESR2 leads to upregulation of both granulosa cell and oocyte derived factors that can activate the AKT, ERK and mTOR pathways. Increased levels of KITLG, KIT and IGF1, as well as NPM2, and ADCYAP1R1 can activate the AKT pathway followed by the mTOR pathway. Moreover, upregulation of NPM2 and BMP4 can activate the ERK pathway. Activated AKT, ERK and mTOR pathways in association with the transcriptional regulator GATA4 can promote the transition of primordial follicles to primary follicles in *Esr2*<sup>-/-</sup> ovaries.

## References

1. Zuckerman S. The Number of Oocytes in the Mature Ovary. Recent Prog Horm Res 1951; 6:63-109
2. Peters H. The development of the mouse ovary from birth to maturity. Acta endocrinologica 1969; 62:98-116
3. Peters H, Levy E, Crone M. Deoxyribonucleic acid synthesis in oocytes of mouse embryos. Nature 1962; 195:915-916
4. Li L, Fu Y-c, Xu J-j, Lin X-h, Chen X-c, Zhang X-m, Luo L-l. Caloric restriction promotes the reserve of follicle pool in adult female rats by inhibiting the activation of mammalian target of rapamycin signaling. Reprod Sci 2015; 22:60-67
5. Bristol-Gould SK, Kreeger PK, Selkirk CG, Kilen SM, Mayo KE, Shea LD, Woodruff TK. Fate of the initial follicle pool: empirical and mathematical evidence supporting its sufficiency for adult fertility. Developmental biology 2006; 298:149-154

- 432   **6.**     Adhikari D, Risal S, Liu K, Shen Y. Pharmacological inhibition of mTORC1 prevents  
433           over-activation of the primordial follicle pool in response to elevated PI3K signaling. *PloS*  
434           *one* 2013; 8:e53810-e53810
- 435   **7.**     De Vos M, Devroey P, Fauser BC. Primary ovarian insufficiency. *Lancet* (London,  
436           England) 2010; 376:911-921
- 437   **8.**     Coulam CB, Adamson SC, Annegers JF. Incidence of premature ovarian failure. *Obstetrics*  
438           *and gynecology* 1986; 67:604-606
- 439   **9.**     Nelson LM. Clinical practice. Primary ovarian insufficiency. *The New England journal of*  
440           *medicine* 2009; 360:606-614
- 441   **10.**    Jankowska K. Premature ovarian failure. *Prz Menopauzalny* 2017; 16:51-56
- 442   **11.**    Hsueh AJW, Kawamura K, Cheng Y, Fauser BCJM. Intraovarian Control of Early  
443           Folliculogenesis. *Endocrine reviews* 2015; 36:1-24
- 444   **12.**    Meredith S, Dudenhoefter G, Jackson K. Classification of small type B/C follicles as  
445           primordial follicles in mature rats. *Journal of reproduction and fertility* 2000; 119:43-48
- 446   **13.**    Epifano O, Liang LF, Familari M, Moos MC, Jr., Dean J. Coordinate expression of the  
447           three zona pellucida genes during mouse oogenesis. *Development (Cambridge, England)*  
448           1995; 121:1947-1956
- 449   **14.**    Adhikari D, Liu K. Molecular mechanisms underlying the activation of mammalian  
450           primordial follicles. *Endocrine reviews* 2009; 30:438-464
- 451   **15.**    Nilsson EE, Kezele P, Skinner MK. Leukemia inhibitory factor (LIF) promotes the  
452           primordial to primary follicle transition in rat ovaries. *Molecular and cellular*  
453           *endocrinology* 2002; 188:65-73

16. Zhang H, Liu K. Cellular and molecular regulation of the activation of mammalian primordial follicles: somatic cells initiate follicle activation in adulthood. Human reproduction update 2015; 21:779-786
17. Zhang H, Risal S, Gorre N, Busayavalasa K, Li X, Shen Y, Bosbach B, Brannstrom M, Liu K. Somatic cells initiate primordial follicle activation and govern the development of dormant oocytes in mice. Current biology : CB 2014; 24:2501-2508
18. Da Silva-Buttkus P, Marcelli G, Franks S, Stark J, Hardy K. Inferring biological mechanisms from spatial analysis: prediction of a local inhibitor in the ovary. Proceedings of the National Academy of Sciences of the United States of America 2009; 106:456-461
19. Silva JR, van den Hurk R, van Tol HT, Roelen BA, Figueiredo JR. Expression of growth differentiation factor 9 (GDF9), bone morphogenetic protein 15 (BMP15), and BMP receptors in the ovaries of goats. Molecular reproduction and development 2005; 70:11-19
20. Sun RZ, Lei L, Cheng L, Jin ZF, Zu SJ, Shan ZY, Wang ZD, Zhang JX, Liu ZH. Expression of GDF-9, BMP-15 and their receptors in mammalian ovary follicles. J Mol Histol 2010; 41:325-332
21. Durlinger AL, Kramer P, Karels B, de Jong FH, Uilenbroek JT, Grootegoed JA, Themmen AP. Control of primordial follicle recruitment by anti-Mullerian hormone in the mouse ovary. Endocrinology 1999; 140:5789-5796
22. Parrott JA, Skinner MK. Kit-ligand/stem cell factor induces primordial follicle development and initiates folliculogenesis. Endocrinology 1999; 140:4262-4271
23. Nilsson E, Parrott JA, Skinner MK. Basic fibroblast growth factor induces primordial follicle development and initiates folliculogenesis. Molecular and cellular endocrinology 2001; 175:123-130

24. Adachi S, Yamada S, Takatsu Y, Matsui H, Kinoshita M, Takase K, Sugiura H, Ohtaki T, Matsumoto H, Uenoyama Y, Tsukamura H, Inoue K, Maeda K. Involvement of anteroventral periventricular metastin/kisspeptin neurons in estrogen positive feedback action on luteinizing hormone release in female rats. *The Journal of reproduction and development* 2007; 53:367-378
25. Castrillon DH, Miao L, Kollipara R, Horner JW, DePinho RA. Suppression of ovarian follicle activation in mice by the transcription factor Foxo3a. *Science (New York, NY)* 2003; 301:215-218
26. Schmidt D, Ovitt CE, Anlag K, Fehsenfeld S, Gredsted L, Treier AC, Treier M. The murine winged-helix transcription factor Foxl2 is required for granulosa cell differentiation and ovary maintenance. *Development (Cambridge, England)* 2004; 131:933-942
27. Pangas SA, Choi Y, Ballow DJ, Zhao Y, Westphal H, Matzuk MM, Rajkovic A. Oogenesis requires germ cell-specific transcriptional regulators Sohlh1 and Lhx8. *Proceedings of the National Academy of Sciences of the United States of America* 2006; 103:8090-8095
28. Choi Y, Yuan D, Rajkovic A. Germ cell-specific transcriptional regulator sohlh2 is essential for early mouse folliculogenesis and oocyte-specific gene expression. *Biology of reproduction* 2008; 79:1176-1182
29. Rajkovic A, Pangas SA, Ballow D, Suzumori N, Matzuk MM. NOBOX deficiency disrupts early folliculogenesis and oocyte-specific gene expression. *Science (New York, NY)* 2004; 305:1157-1159
30. Padua MB, Fox SC, Jiang T, Morse DA, Tevosian SG. Simultaneous gene deletion of gata4 and gata6 leads to early disruption of follicular development and germ cell loss in the murine ovary. *Biology of reproduction* 2014; 91:24

- 500 **31.** Byers M, Kuiper GG, Gustafsson JA, Park-Sarge OK. Estrogen receptor-beta mRNA  
501 expression in rat ovary: down-regulation by gonadotropins. *Molecular endocrinology*  
502 (Baltimore, Md) 1997; 11:172-182
- 503 **32.** Slomczynska M, Duda M, Galas J. Estrogen receptor alpha and beta expression in the  
504 porcine ovary. *Folia histochemica et cytobiologica* 2001; 39:137-138
- 505 **33.** Pelletier G, El-Alfy M. Immunocytochemical localization of estrogen receptors alpha and  
506 beta in the human reproductive organs. *The Journal of clinical endocrinology and*  
507 *metabolism* 2000; 85:4835-4840
- 508 **34.** Couse JF, Yates MM, Sanford R, Nyska A, Nilson JH, Korach KS. Formation of cystic  
509 ovarian follicles associated with elevated luteinizing hormone requires estrogen receptor-  
510 beta. *Endocrinology* 2004; 145:4693-4702
- 511 **35.** Asadi M, Ghafouri-Fard S, Zare-Abdollahi D, Ebrahim-Habibi A, Matin N. Estrogen  
512 receptor mutation in a girl with primary amenorrhea. *Clinical genetics* 2013; 83:497-498
- 513 **36.** Lang-Muritano M, Sproll P, Wyss S, Kolly A, Hurlimann R, Konrad D, Biason-Lauber A.  
514 Early-Onset Complete Ovarian Failure and Lack of Puberty in a Woman With Mutated  
515 Estrogen Receptor beta (ESR2). *The Journal of clinical endocrinology and metabolism*  
516 2018; 103:3748-3756
- 517 **37.** Kim JJ, Choi YM, Choung SH, Yoon SH, Lee GH, Moon SY. Estrogen receptor beta gene  
518 +1730 G/A polymorphism in women with polycystic ovary syndrome. *Fertility and sterility*  
519 2010; 93:1942-1947
- 520 **38.** Sundarajan C, Liao WX, Roy AC, Ng SC. Association between estrogen receptor-beta  
521 gene polymorphisms and ovulatory dysfunctions in patients with menstrual disorders. *The*  
522 *Journal of clinical endocrinology and metabolism* 2001; 86:135-139

39. Dupont S, Krust A, Gansmuller A, Dierich A, Chambon P, Mark M. Effect of single and compound knockouts of estrogen receptors alpha (ERalpha) and beta (ERbeta) on mouse reproductive phenotypes. *Development (Cambridge, England)* 2000; 127:4277-4291
40. Couse JF, Yates MM, Deroo BJ, Korach KS. Estrogen receptor-beta is critical to granulosa cell differentiation and the ovulatory response to gonadotropins. *Endocrinology* 2005; 146:3247-3262
41. Rumi MAK, Singh P, Roby KF, Zhao X, Iqbal K, Ratri A, Lei T, Cui W, Borosha S, Dhakal P, Kubota K, Chakraborty D, Vivian JL, Wolfe MW, Soares MJ. Defining the Role of Estrogen Receptor beta in the Regulation of Female Fertility. *Endocrinology* 2017; 158:2330-2343
42. Britt KL, Saunders PK, McPherson SJ, Misso ML, Simpson ER, Findlay JK. Estrogen actions on follicle formation and early follicle development. *Biology of reproduction* 2004; 71:1712-1723
43. Kezele P, Skinner MK. Regulation of ovarian primordial follicle assembly and development by estrogen and progesterone: endocrine model of follicle assembly. *Endocrinology* 2003; 144:3329-3337
44. Rumi MA, Dhakal P, Kubota K, Chakraborty D, Lei T, Larson MA, Wolfe MW, Roby KF, Vivian JL, Soares MJ. Generation of ESR1-knockout rats using zinc finger nuclease-mediated genome editing. *Endocrinology* 2014; 155:1991-1999
45. Chakravarthi VP, Khristi V, Ghosh S, Yerrathota S, Dai E, Roby KF, Wolfe MW, Rumi MAK. ESR2 Is Essential for Gonadotropin-Induced Kiss1 Expression in Granulosa Cells. *Endocrinology* 2018; 159:3860-3873



46. Compton DR, Sheng S, Carlson KE, Rebacz NA, Lee IY, Katzenellenbogen BS, Katzenellenbogen JA. Pyrazolo[1,5-a]pyrimidines: estrogen receptor ligands possessing estrogen receptor beta antagonist activity. *Journal of medicinal chemistry* 2004; 47:5872-5893
47. Meyers MJ, Sun J, Carlson KE, Marriner GA, Katzenellenbogen BS, Katzenellenbogen JA. Estrogen receptor-beta potency-selective ligands: structure-activity relationship studies of diarylpropionitriles and their acetylene and polar analogues. *Journal of medicinal chemistry* 2001; 44:4230-4251
48. Terranova PF, Garza F. Relationship between the preovulatory luteinizing hormone (LH) surge and androstenedione synthesis of preantral follicles in the cyclic hamster: detection by in vitro responses to LH. *Biology of reproduction* 1983; 29:630-636
49. Roby KF, Son DS, Terranova PF. Alterations of events related to ovarian function in tumor necrosis factor receptor type I knockout mice. *Biology of reproduction* 1999; 61:1616-1621
50. Roby KF. Alterations in follicle development, steroidogenesis, and gonadotropin receptor binding in a model of ovulatory blockade. *Endocrinology* 2001; 142:2328-2335
51. Roby KF, Son DS, Taylor CC, Montgomery-Rice V, Kirchoff J, Tang S, Terranova PF. Alterations in reproductive function in SRC tyrosine kinase knockout mice. *Endocrine* 2005; 26:169-176
52. Pedersen T, Peters H. Proposal for a classification of oocytes and follicles in the mouse ovary. *Journal of reproduction and fertility* 1968; 17:555-557
53. Reddy P, Zheng W, Liu K. Mechanisms maintaining the dormancy and survival of mammalian primordial follicles. *Trends in endocrinology and metabolism: TEM* 2010; 21:96-103

- 568   **54.**   Wang C, Roy SK. Development of primordial follicles in the hamster: role of estradiol-  
569       17beta. *Endocrinology* 2007; 148:1707-1716
- 570   **55.**   Zachos NC, Billiar RB, Albrecht ED, Pepe GJ. Developmental regulation of baboon fetal  
571       ovarian maturation by estrogen. *Biology of reproduction* 2002; 67:1148-1156
- 572   **56.**   de Vet A, Laven JS, de Jong FH, Themmen AP, Fauser BC. Antimullerian hormone serum  
573       levels: a putative marker for ovarian aging. *Fertility and sterility* 2002; 77:357-362
- 574   **57.**   Meduri G, Massin N, Guibourdenche J, Bachelot A, Fiori O, Kuttenn F, Misrahi M,  
575       Touraine P. Serum anti-Mullerian hormone expression in women with premature ovarian  
576       failure. *Human reproduction (Oxford, England)* 2007; 22:117-123
- 577   **58.**   Swedenborg E, Pongratz I, Gustafsson JA. Endocrine disruptors targeting ERbeta function.  
578       *International journal of andrology* 2010; 33:288-297
- 579   **59.**   Patel S, Zhou C, Rattan S, Flaws JA. Effects of Endocrine-Disrupting Chemicals on the  
580       Ovary. *Biology of reproduction* 2015; 93:20
- 581   **60.**   Zhang L, Sedykh A, Tripathi A, Zhu H, Afantitis A, Mouchlis VD, Melagraki G, Rusyn I,  
582       Tropsha A. Identification of putative estrogen receptor-mediated endocrine disrupting  
583       chemicals using QSAR- and structure-based virtual screening approaches. *Toxicology and*  
584       *applied pharmacology* 2013; 272:67-76
- 585   **61.**   Shanle EK, Xu W. Endocrine disrupting chemicals targeting estrogen receptor signaling:  
586       identification and mechanisms of action. *Chemical research in toxicology* 2011; 24:6-19
- 587   **62.**   Reddy P, Liu L, Adhikari D, Jagarlamudi K, Rajareddy S, Shen Y, Du C, Tang W,  
588       Hamalainen T, Peng SL, Lan ZJ, Cooney AJ, Huhtaniemi I, Liu K. Oocyte-specific  
589       deletion of Pten causes premature activation of the primordial follicle pool. *Science (New*  
590       *York, NY)* 2008; 319:611-613

63. Edson MA, Nagaraja AK, Matzuk MM. The mammalian ovary from genesis to revelation. Endocrine reviews 2009; 30:624-712
64. Zhao Y, Zhang Y, Li J, Zheng N, Xu X, Yang J, Xia G, Zhang M. MAPK3/1 participates in the activation of primordial follicles through mTORC1-KITL signaling. J Cell Physiol 2018; 233:226-237
65. Blume-Jensen P, Janknecht R, Hunter T. The kit receptor promotes cell survival via activation of PI 3-kinase and subsequent Akt-mediated phosphorylation of Bad on Ser136. Current biology : CB 1998; 8:779-782
66. Jin X, Han CS, Yu FQ, Wei P, Hu ZY, Liu YX. Anti-apoptotic action of stem cell factor on oocytes in primordial follicles and its signal transduction. Molecular reproduction and development 2005; 70:82-90
67. John GB, Shidler MJ, Besmer P, Castrillon DH. Kit signaling via PI3K promotes ovarian follicle maturation but is dispensable for primordial follicle activation. Developmental biology 2009; 331:292-299
68. Zhao L, Du X, Huang K, Zhang T, Teng Z, Niu W, Wang C, Xia G. Rac1 modulates the formation of primordial follicles by facilitating STAT3-directed Jagged1, GDF9 and BMP15 transcription in mice. Sci Rep 2016; 6:23972
69. Jadrich JL, O'Connor MB, Coucouvanis E. Expression of TAK1, a mediator of TGF-beta and BMP signaling, during mouse embryonic development. Gene Expr Patterns 2003; 3:131-134
70. Tsunemoto K, Anzai M, Matsuoka T, Tokoro M, Shin SW, Amano T, Mitani T, Kato H, Hosoi Y, Saeki K, Iritani A, Matsumoto K. Cis-acting elements (E-box and NBE) in the promoter region of three maternal genes (Histone H1oo, Nucleoplasmin 2, and Zygote

Arrest 1) are required for oocyte-specific gene expression in the mouse. *Molecular reproduction and development* 2008; 75:1104-1108

**71.** Slupianek A, Nieborowska-Skorska M, Hoser G, Morrione A, Majewski M, Xue L, Morris SW, Wasik MA, Skorski T. Role of phosphatidylinositol 3-kinase-Akt pathway in nucleophosmin/anaplastic lymphoma kinase-mediated lymphomagenesis. *Cancer research* 2001; 61:2194-2199

**72.** Bai RY, Ouyang T, Miething C, Morris SW, Peschel C, Duyster J. Nucleophosmin-anaplastic lymphoma kinase associated with anaplastic large-cell lymphoma activates the phosphatidylinositol 3-kinase/Akt antiapoptotic signaling pathway. *Blood* 2000; 96:4319-4327

**73.** Marzec M, Kasprzycka M, Liu X, Raghunath PN, Wlodarski P, Wasik MA. Oncogenic tyrosine kinase NPM/ALK induces activation of the MEK/ERK signaling pathway independently of c-Raf. *Oncogene* 2007; 26:813-821

**74.** Tong T, Shen Y, Lee HW, Yu R, Park T. Adenylyl cyclase 3 haploinsufficiency confers susceptibility to diet-induced obesity and insulin resistance in mice. *Sci Rep* 2016; 6:34179

**Table 1. List of antibodies used in the western blot assays**

| Target  | Name of Antibody                             | Manufacturer, Catalog number     | Species, Mono or Polyclonal | Dilution | RRID        |
|---------|----------------------------------------------|----------------------------------|-----------------------------|----------|-------------|
| ESR2    | Anti-ESR2, clone 68-4                        | EMD Millipore, 05-824 P          | Rabbit; monoclonal          | 5000     | AB_11212759 |
| pAKT    | Anti-Phospho-Akt (T308)                      | Cell Signaling Technology, 13038 | Rabbit; monoclonal          | 2000     | AB_2629447  |
| pAKT    | Anti-Phospho-Akt (Ser473)                    | Cell Signaling Technology, 4060  | Rabbit; monoclonal          | 2000     | AB_2315049  |
| AKT     | Anti- Akt                                    | Cell Signaling Technology, 4691  | Rabbit; monoclonal          | 2000     | AB_915783   |
| PTEN    | PTEN (D4.3)                                  | Cell Signaling Technology, 9188  | Rabbit; monoclonal          | 2000     | AB_2253290  |
| ERK     | Anti-p44/42 MAPK (ERK1/2)                    | Cell Signaling Technology, 4695  | Rabbit; monoclonal          | 1000     | AB_390779   |
| pERK    | Anti-Phospho-ERK1-T202/Y204 + ERK2-T185/Y187 | Cell Signaling Technology, 4370  | Rabbit; monoclonal          | 2000     | AB_2315112  |
| pTSC2   | Anti-Phospho-TSC2-T1462                      | ABclonal Technology, AP0866      | Rabbit; polyclonal          | 2000     | AB_2771631  |
| TSC2    | Anti-TSC2                                    | ABclonal Technology, A0492       | Rabbit; polyclonal          | 2000     | AB_2757221  |
| pmTORC1 | Anti-Phospho-mTOR (Ser2448)                  | Cell Signaling Technology, 5536  | Rabbit; monoclonal          | 2000     | AB_10691552 |
| mTORC1  | Anti-mTOR                                    | Cell Signaling Technology, 2983  | Rabbit; monoclonal          | 2000     | AB_2105622  |
| pP70S6K | Anti-pP70S6Kinase (T389)                     | Cell Signaling Technology, 9234  | Rabbit; monoclonal          | 2000     | AB_2269803  |
| pRPS6   | Anti-pS6 Ribosomal Protein (Ser240/244)      | Cell Signaling Technology, 5364  | Rabbit; monoclonal          | 2000     | AB_10694233 |
| ACTB    | Anti- $\beta$ -actin                         | Sigma-Aldrich (AC15), A 1978     | Mouse; monoclonal           | 25,000   | AB_476692   |

**Table 2. List of primers used in the qPCR assays**

| <b>Symbol</b>    | <b>Reference mRNA</b> | <b>Forward Primer</b>      | <b>Reverse Primer</b>       | <b>Amplicon</b> |
|------------------|-----------------------|----------------------------|-----------------------------|-----------------|
| <i>Esr2</i>      | NM_012754.1           | 1101F-GAAGCTGAACCACCCAATGT | 1310R-CAGTCCCACCATTAGCACCT  | 210bp           |
| <i>Kitlg</i>     | NM_021843.4           | 296F-CAAAACTGGTGGCGAATCTT  | 512R-GCCACGAGGTCATCCACTAT   | 217bp           |
| <i>Kit</i>       | NM_022264.1           | 2768F-GATGCTGATCCCCTGAAAAG | 2962R-AGGAGAGGCTGTGTGGAAGA  | 195bp           |
| <i>Igf1</i>      | NM_001082477.2        | 155F-CTGGTGGACGCTCTTCAGTT  | 320R-TCAGCGGAGCACAGTACATC   | 166bp           |
| <i>Fgf2</i>      | NM_019305.2           | 697F-CGACCCACACGTCAAACCTAC | 770R-CGGTACCTGGCTATGAAGGA   | 74bp            |
| <i>Ntrk2</i>     | NM_001163168.2        | 1979F-GTGGTGGTGATTGCCTCTGT | 2134R-CCCAGCCTTGTCTTTCCTTT  | 156bp           |
| <i>Adcyap1r1</i> | NM_001270579.1        | 378F-TGCCTGTGGCTATTGCTATG  | 575R-AGACCTCAGGGCAGCTTACA   | 198bp           |
| <i>Bmp4</i>      | NM_012927.2           | 539F-GACTTCGAGGCGACACTTCT  | 775R-ACTGGTCCCTGGGATGTTCT   | 236bp           |
| <i>Bmp15</i>     | NM_021670.1           | 525F-GAGGCTGATAAAGCCGTCAG  | 633R-AAGTTGATGGCGGTAGACCA   | 109bp           |
| <i>Gdf9</i>      | NM_021672.1           | 330F-CTACAATACCGTCCGGCTCT  | 475R-GCAAGACCGATTTGAGTAAGTG | 146bp           |
| <i>Amh</i>       | NM_012902.1           | 280F-CTAGCCACCTTCGGAGTCTG  | 441R-AGGCTCTTGGAACCTCAGCA   | 162bp           |
| <i>Bdnf</i>      | NM_001270630.1        | 546F-GTCCCTGGCTGACACTTTTG  | 733R-CGGCATCCAGGTAATTTTGT   | 188bp           |
| <i>Nobox</i>     | NM_001192013.1        | 549F-TCAGAACCGTAGGGCAAAGT  | 737R-GGCTCAGTAAAGCCATCCAG   | 189bp           |
| <i>Sohlh1</i>    | NM_001191852.1        | 437F-CAGACTCCGGGATAGCAAAA  | 622R-CCAAGCTGGAGGACTCTGAC   | 186bp           |
| <i>Gata4</i>     | NM_144730.1           | 1029F-CTCCTACTCCAGCCCCTACC | 1315R-GCCGGTTGATACCATTCATCT | 287bp           |
| <i>Npm2</i>      | NM_203340.1           | 368F-CCTGGGAAGATGATGAGGAA  | 612R-CGTCGACCTCTTAGGTTTGG   | 245bp           |

Figure 1

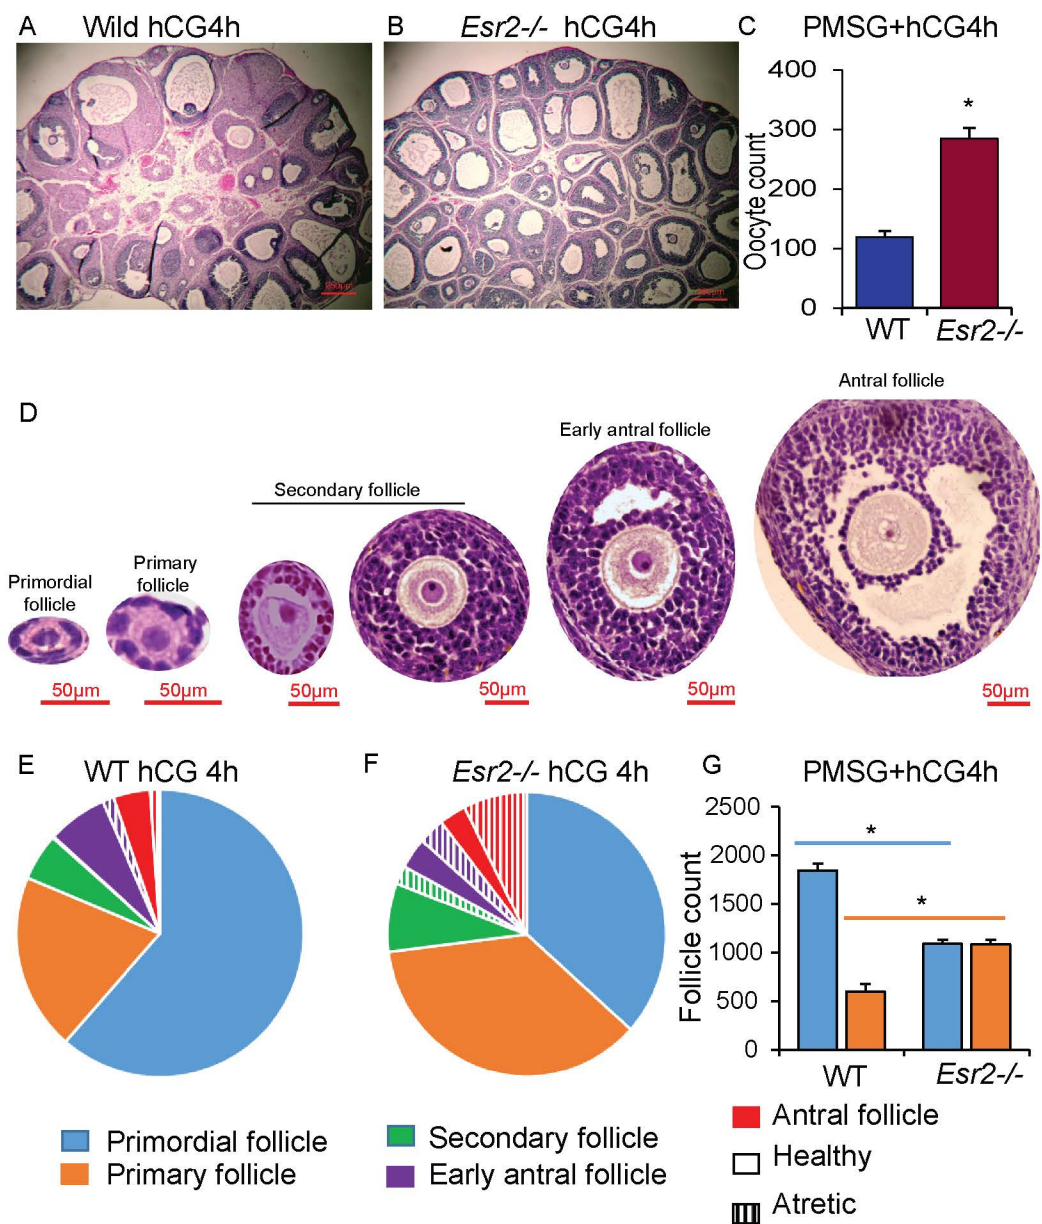



Figure 2

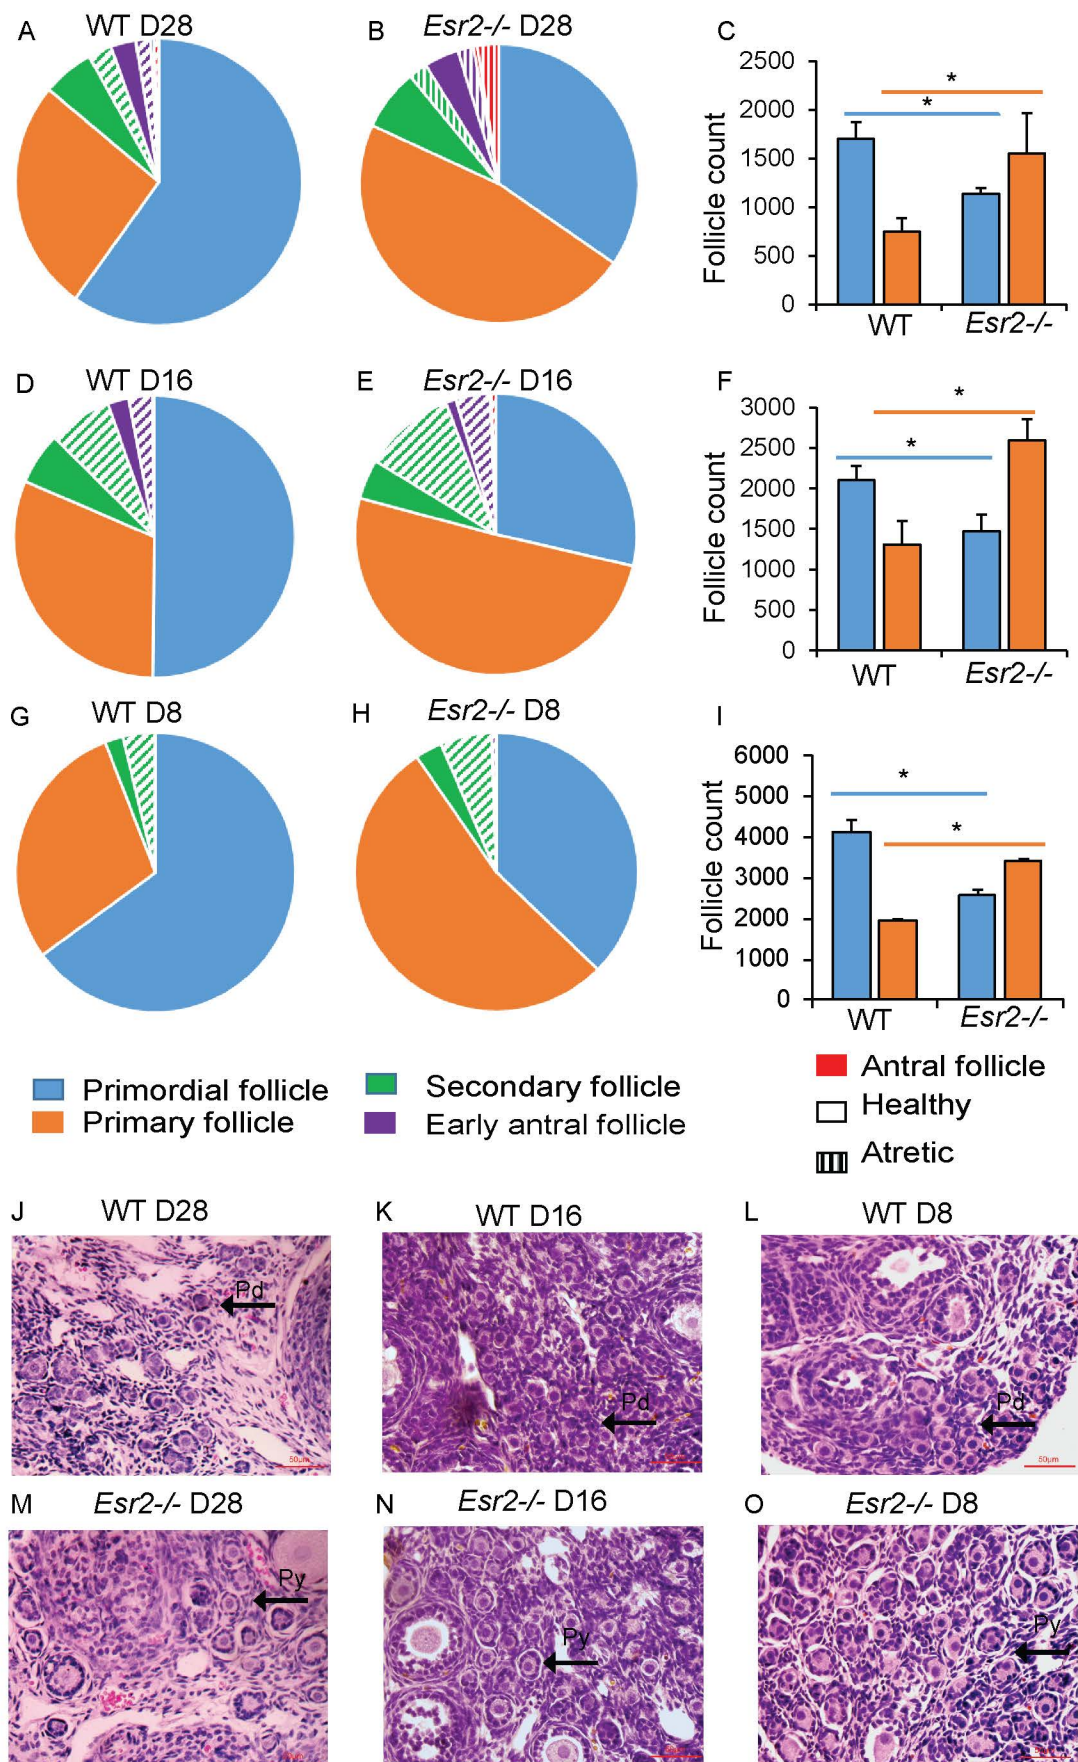



Figure 3

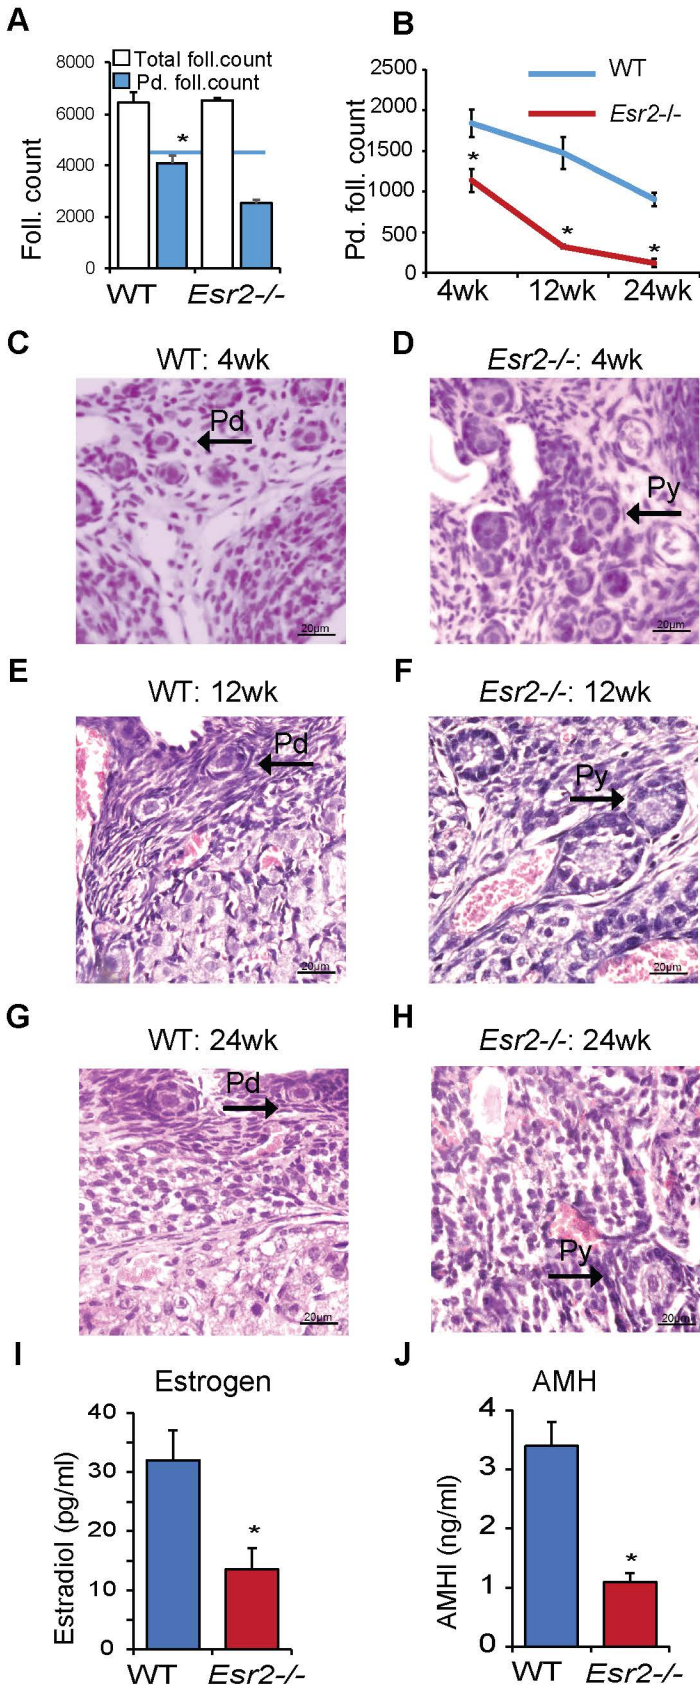

Figure 4

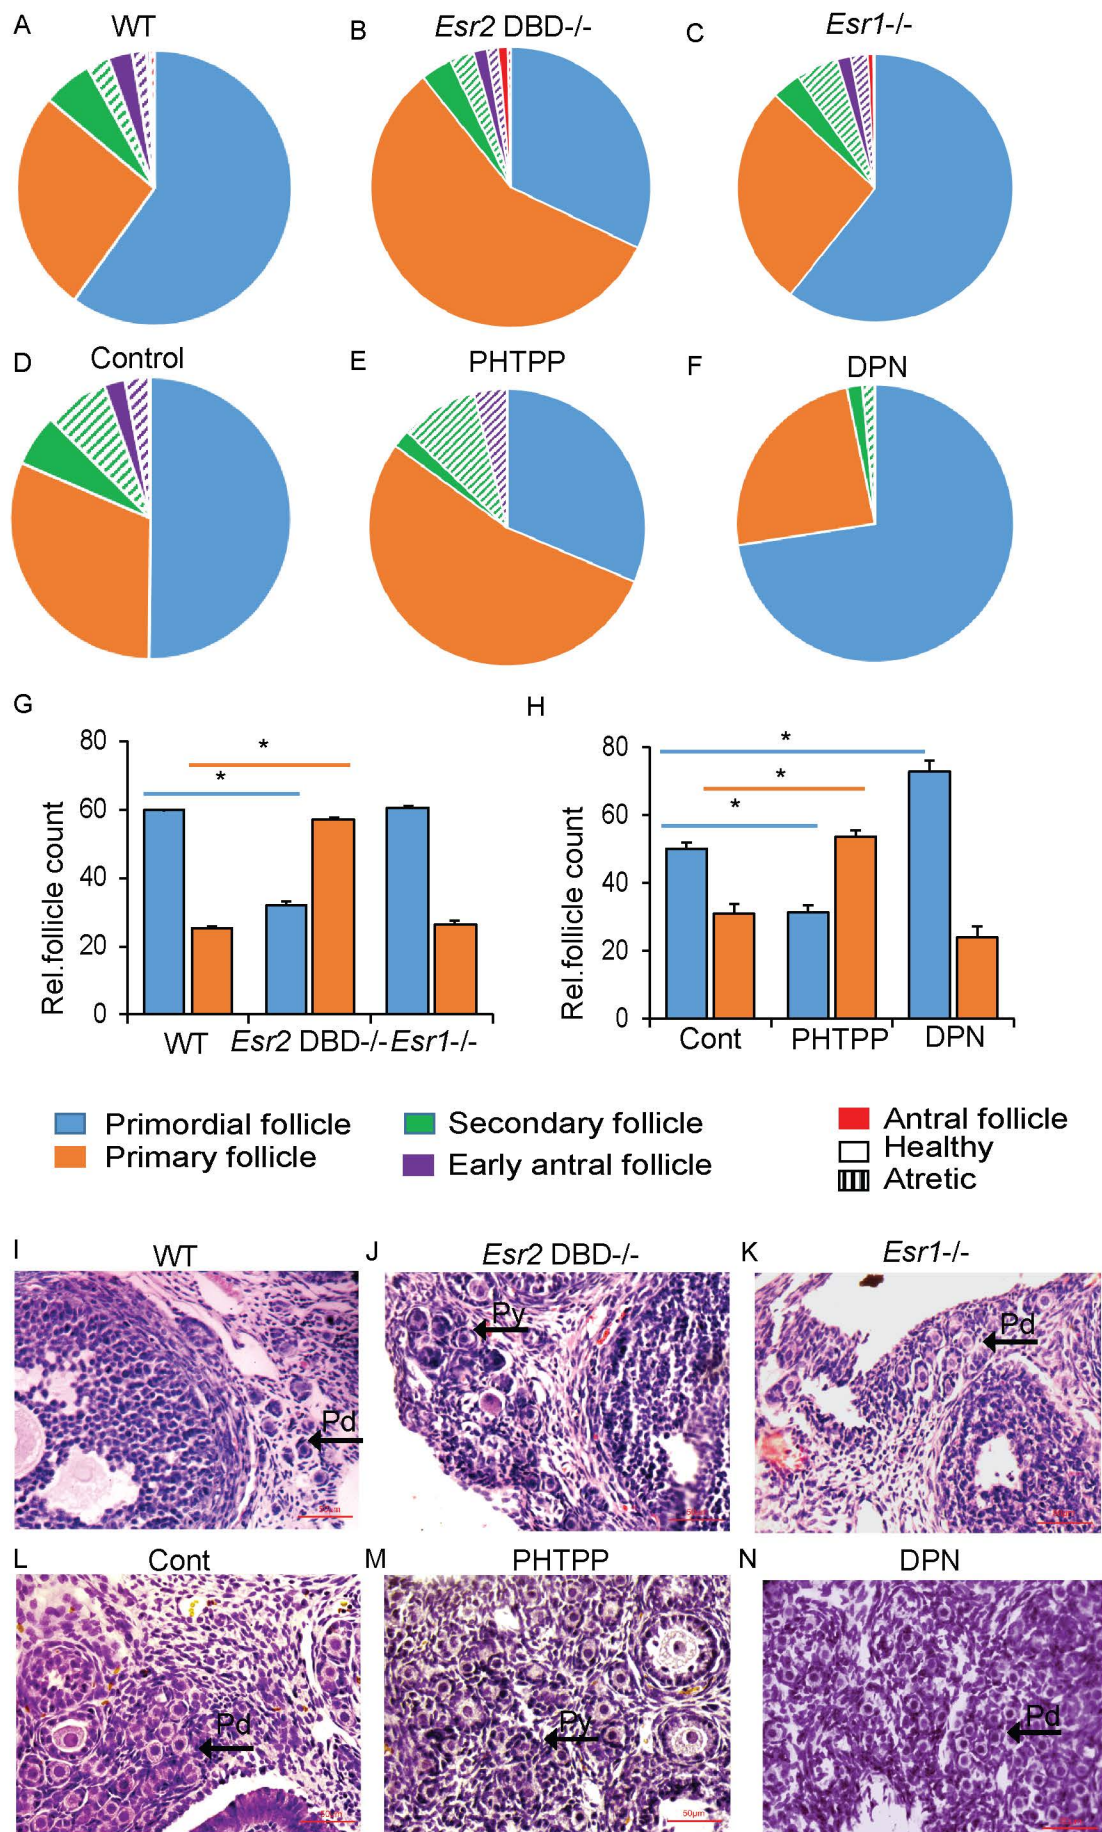

**Figure 5**

bioRxiv preprint doi: <https://doi.org/10.1101/2020.02.06.937953>; this version posted February 7, 2020. The copyright holder for this preprint (which was not certified by peer review) is the author/funder. All rights reserved. No reuse allowed without permission.

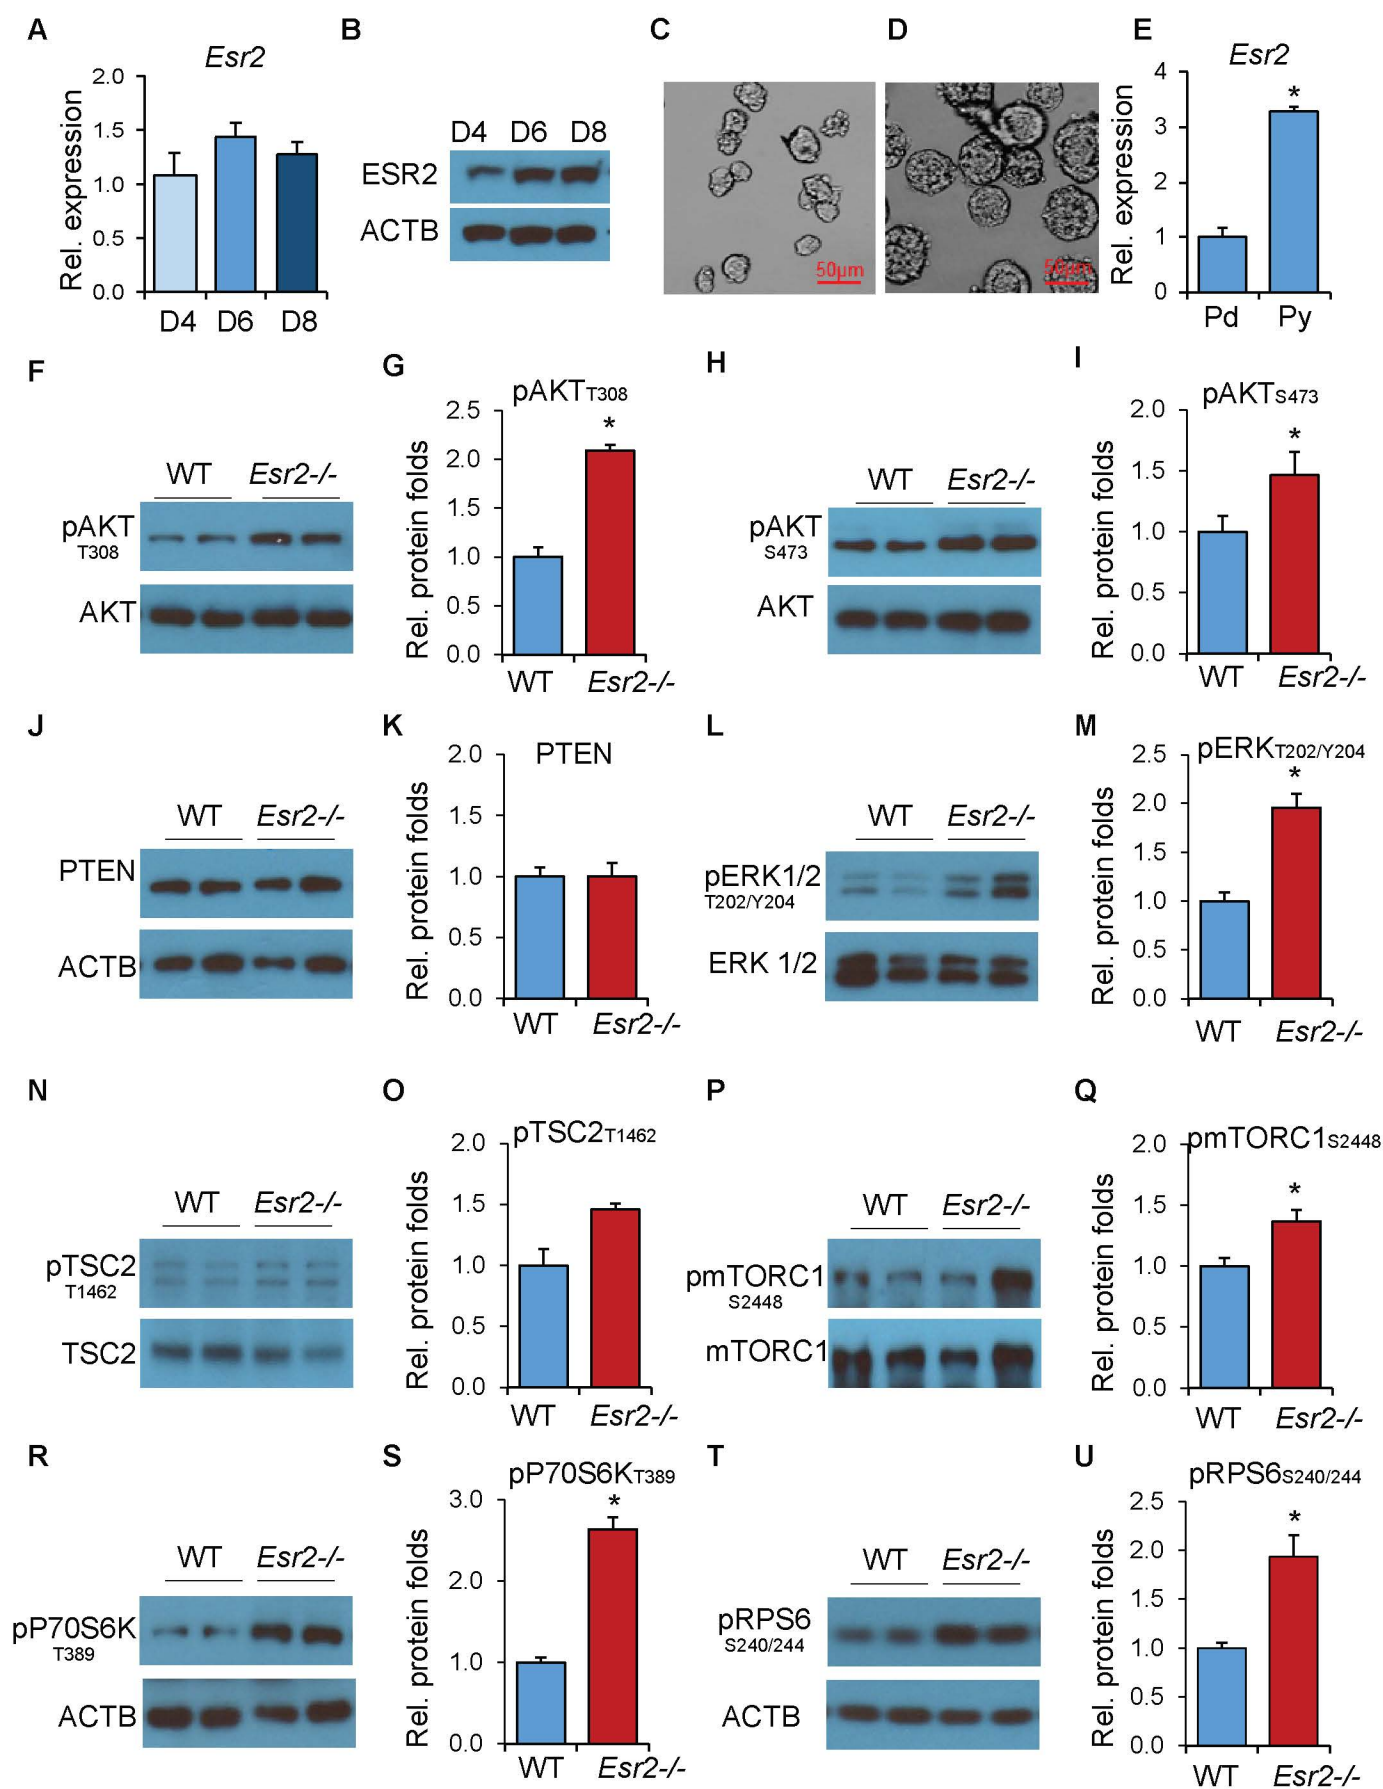



**Figure 6**

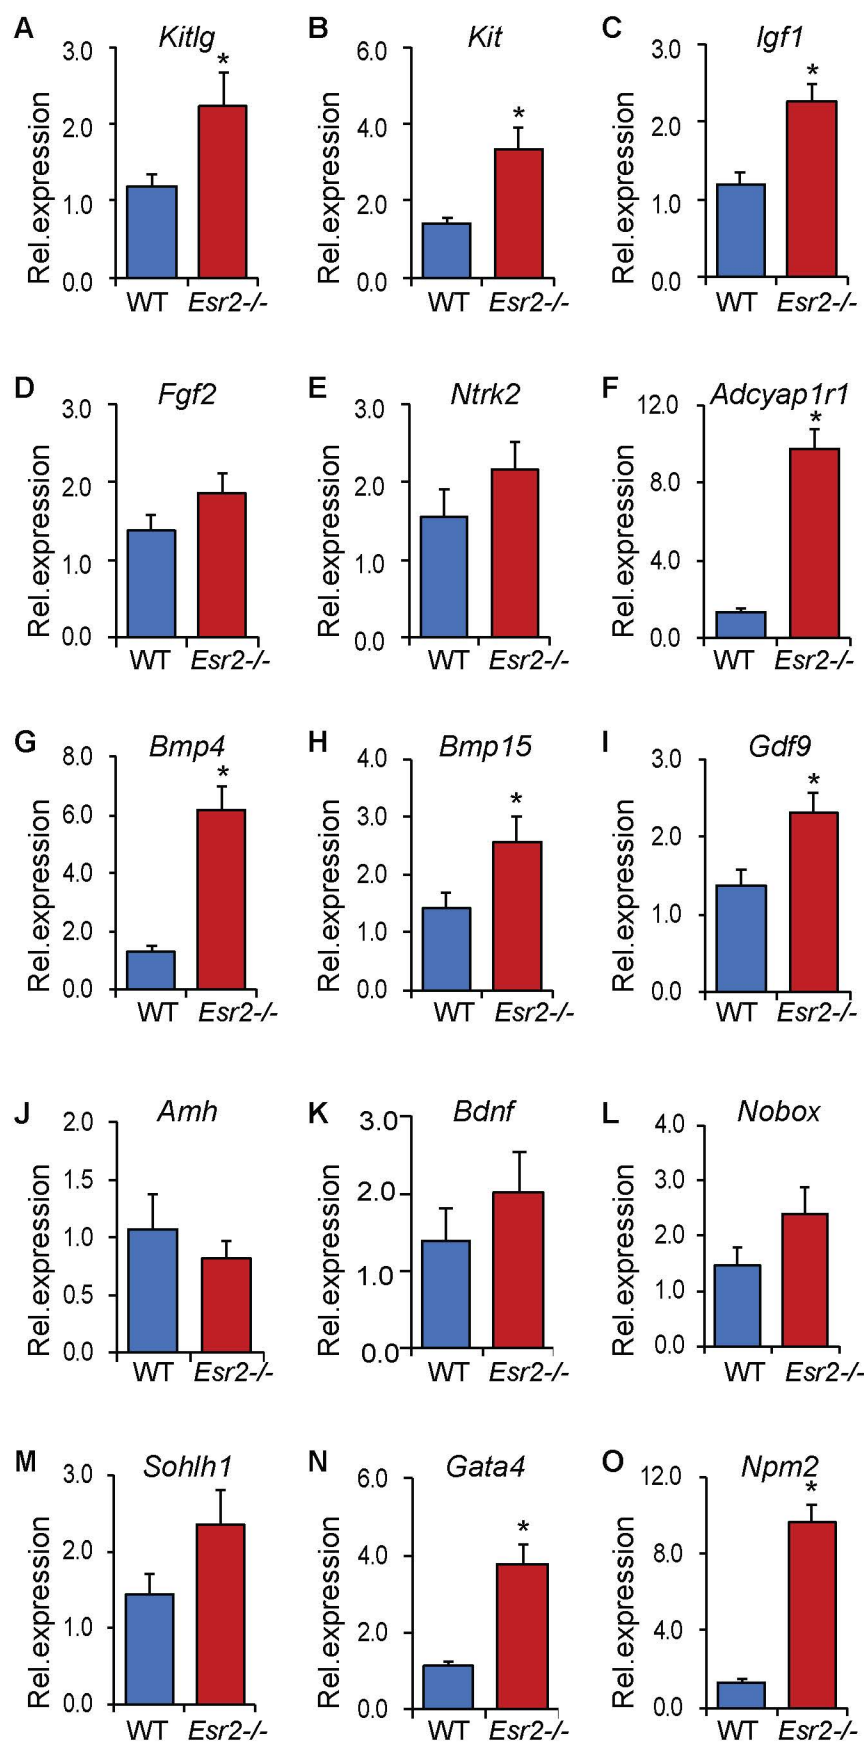

**Figure 7**

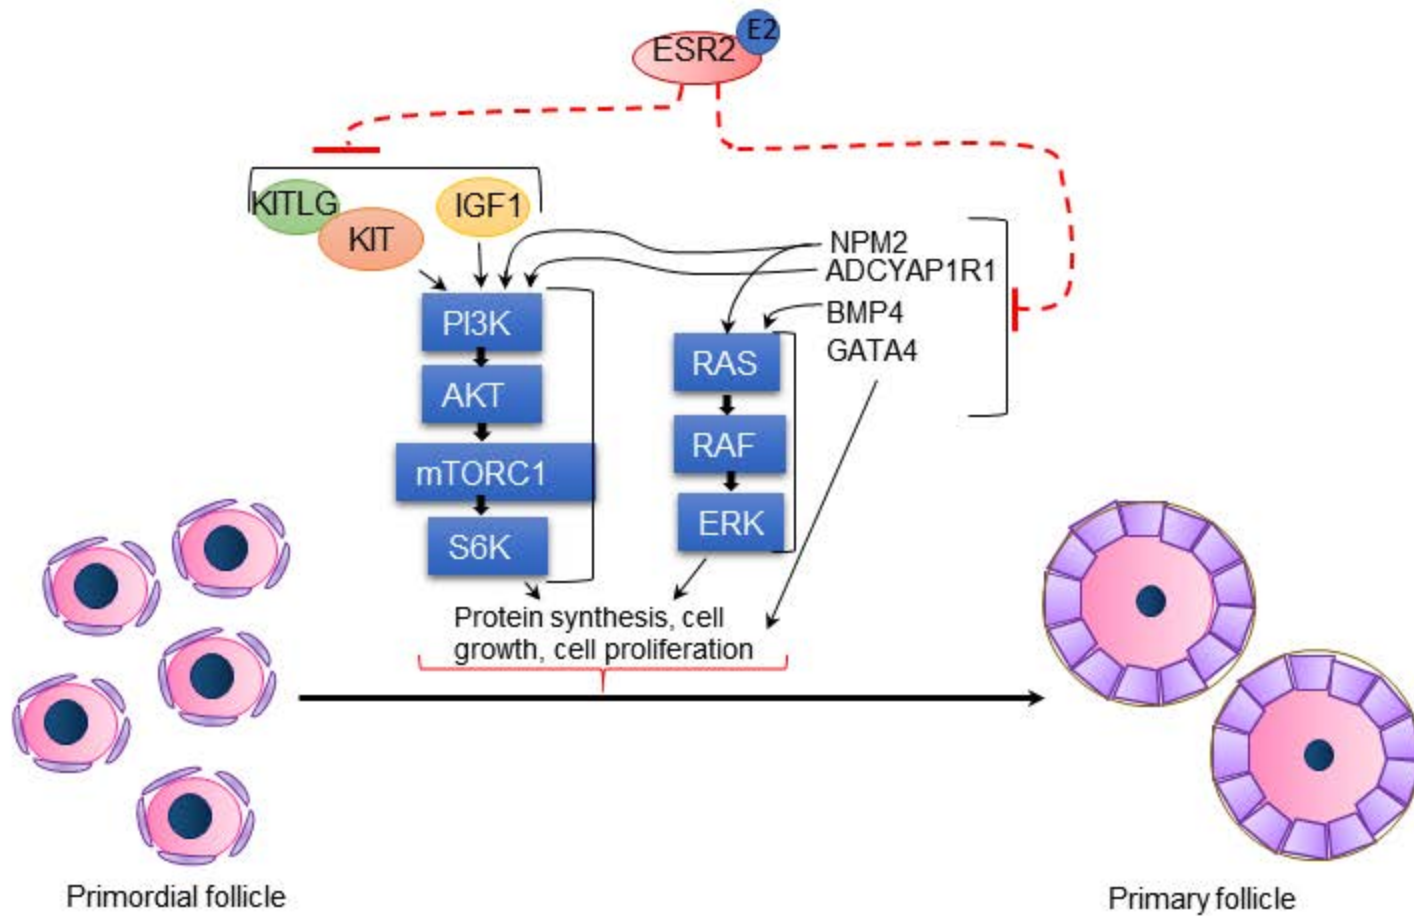

Source: https://www.biorxiv.org/content/10.1101/2020.02.06.937953v1.full.pdf
